# Supplementary material for: Automated characterization of patient–ventilator interaction using surface electromyography
Source: Springer Nature journal article supplement (doi:10.1186/s13613-024-01259-5), 2024-02-26
Supplement: MOESM2 [file 26784424]

### Number of recordings, annotations and detected breaths

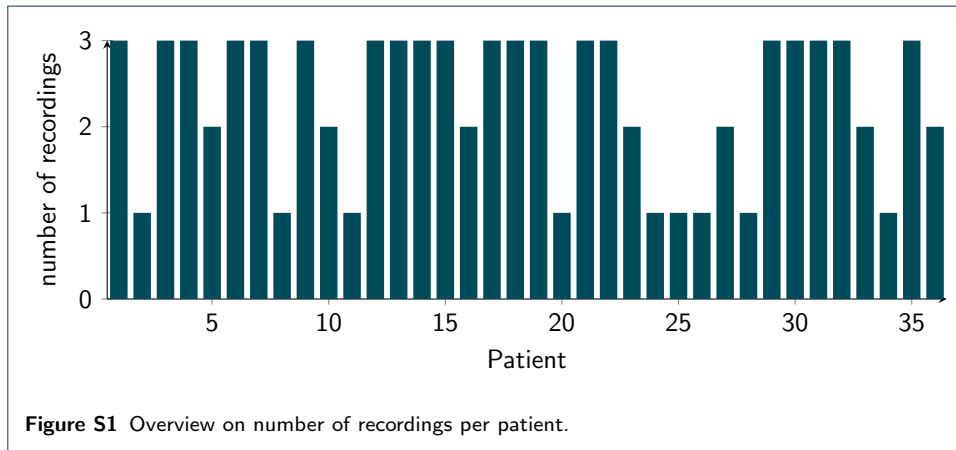

**Table S1** Number of annotated/detected breaths for each patient and recording.

| Patient<br>(Recording) | $P_{es}$ |          |           | sEMG (costal margin)  |                                       | sEMG (parasternal)    |                                       | earliest sEMG (diaphragm in %) |                                       |
|------------------------|----------|----------|-----------|-----------------------|---------------------------------------|-----------------------|---------------------------------------|--------------------------------|---------------------------------------|
|                        | Expert 1 | Expert 2 | Valid (%) | Triangle<br>algorithm | Adaptive<br>thresholding<br>algorithm | Triangle<br>algorithm | Adaptive<br>thresholding<br>algorithm | Triangle<br>algorithm          | Adaptive<br>thresholding<br>algorithm |
| 1 (2)                  | 103      | 107      | 103 (96)  | 101                   | 142                                   | 99                    | 140                                   | 101 (100)                      | 142 (100)                             |
| 1 (3)                  | 101      | 103      | 100 (96)  | 101                   | 143                                   | 99                    | 123                                   | 101 (100)                      | 143 (100)                             |
| 3 (2)                  | 99       | 119      | 96 (81)   | 144                   | 148                                   | 146                   | 148                                   | 144 (100)                      | 148 (100)                             |
| 3 (3)                  | 101      | 101      | 101 (100) | 99                    | 101                                   | 103                   | 103                                   | 103 (19)                       | 104 (81)                              |
| 4 (3)                  | 0        | 0        | 0 (0)     | 0                     | 0                                     | 114                   | 124                                   | 114 (0)                        | 124 (0)                               |
| 6 (2)                  | 110      | 109      | 59 (52)   | 0                     | 0                                     | 122                   | 161                                   | 122 (0)                        | 161 (0)                               |
| 9 (1)                  | 99       | 93       | 75 (71)   | 0                     | 0                                     | 232                   | 272                                   | 232 (0)                        | 272 (0)                               |
| 9 (2)                  | 104      | 98       | 80 (72)   | 89                    | 111                                   | 81                    | 114                                   | 89 (100)                       | 111 (100)                             |
| 9 (3)                  | 95       | 102      | 89 (85)   | 87                    | 132                                   | 80                    | 126                                   | 87 (100)                       | 132 (100)                             |
| 10 (1)                 | 43       | 40       | 35 (74)   | 78                    | 85                                    | 53                    | 81                                    | 53 (0)                         | 81 (0)                                |
| 10 (2)                 | 105      | 111      | 101 (90)  | 0                     | 0                                     | 102                   | 115                                   | 102 (0)                        | 115 (0)                               |
| 12 (2)                 | 172      | 176      | 146 (79)  | 189                   | 201                                   | 190                   | 200                                   | 190 (2)                        | 200 (2)                               |
| 12 (3)                 | 114      | 117      | 101 (85)  | 127                   | 133                                   | 127                   | 137                                   | 127 (100)                      | 133 (100)                             |
| 13 (2)                 | 1        | 6        | 0 (0)     | 0                     | 0                                     | 26                    | 28                                    | 26 (0)                         | 28 (0)                                |
| 13 (3)                 | 107      | 109      | 102 (93)  | 113                   | 162                                   | 133                   | 140                                   | 113 (100)                      | 162 (100)                             |
| 14 (3)                 | 101      | 104      | 101 (97)  | 182                   | 161                                   | 120                   | 108                                   | 120 (1)                        | 108 (1)                               |
| 15 (2)                 | 129      | 131      | 125 (95)  | 0                     | 0                                     | 0                     | 0                                     | 0                              | 0                                     |
| 15 (3)                 | 0        | 0        | 0 (0)     | 120                   | 132                                   | 112                   | 132                                   | 120 (100)                      | 132 (100)                             |
| 16 (2)                 | 106      | 111      | 106 (95)  | 108                   | 110                                   | 108                   | 112                                   | 109 (20)                       | 114 (52)                              |
| 17 (2)                 | 118      | 117      | 117 (99)  | 121                   | 131                                   | 123                   | 127                                   | 121 (100)                      | 131 (100)                             |
| 17 (3)                 | 118      | 117      | 117 (99)  | 118                   | 118                                   | 112                   | 115                                   | 118 (45)                       | 118 (47)                              |
| 18 (2)                 | 73       | 72       | 72 (99)   | 0                     | 0                                     | 76                    | 77                                    | 76 (0)                         | 77 (0)                                |
| 18 (3)                 | 114      | 123      | 105 (85)  | 0                     | 0                                     | 137                   | 122                                   | 137 (0)                        | 122 (0)                               |
| 19 (2)                 | 122      | 122      | 122 (100) | 120                   | 124                                   | 121                   | 125                                   | 121 (6)                        | 125 (3)                               |
| 21 (1)                 | 109      | 106      | 104 (95)  | 0                     | 0                                     | 108                   | 113                                   | 108 (0)                        | 113 (0)                               |
| 22 (2)                 | 106      | 104      | 81 (76)   | 111                   | 152                                   | 103                   | 124                                   | 111 (100)                      | 152 (100)                             |
| 22 (3)                 | 99       | 101      | 92 (91)   | 142                   | 142                                   | 99                    | 102                                   | 99 (1)                         | 102 (1)                               |
| 29 (2)                 | 114      | 114      | 112 (98)  | 129                   | 132                                   | 123                   | 133                                   | 123 (0)                        | 133 (2)                               |
| 29 (3)                 | 97       | 97       | 96 (98)   | 85                    | 95                                    | 0                     | 0                                     | 85 (100)                       | 95 (100)                              |
| 30 (2)                 | 116      | 117      | 113 (96)  | 0                     | 0                                     | 0                     | 0                                     | 0                              | 0                                     |
| 30 (3)                 | 106      | 107      | 105 (98)  | 0                     | 0                                     | 107                   | 159                                   | 107 (0)                        | 159 (0)                               |
| 32 (3)                 | 104      | 104      | 104 (100) | 105                   | 107                                   | 97                    | 103                                   | 105 (100)                      | 107 (100)                             |
| 33 (1)                 | 100      | 101      | 100 (99)  | 100                   | 104                                   | 100                   | 106                                   | 100 (7)                        | 109 (48)                              |
| 33 (2)                 | 106      | 106      | 106 (100) | 0                     | 0                                     | 106                   | 108                                   | 106 (0)                        | 108 (0)                               |
| 35 (1)                 | 90       | 169      | 90 (53)   | 80                    | 143                                   | 90                    | 155                                   | 80 (100)                       | 143 (100)                             |
| 35 (3)                 | 101      | 100      | 66 (65)   | 157                   | 125                                   | 0                     | 0                                     | 157 (100)                      | 125 (100)                             |
| 36 (1)                 | 103      | 103      | 83 (81)   | 103                   | 114                                   | 103                   | 110                                   | 103 (19)                       | 121 (29)                              |

For each recording, the number of annotated breaths in  $P_{es}$  by each expert individually is given. Additionally, the number of breaths, where both experts agreed, is given (valid breaths). In this work, an agreement is assumed if both experts have detected the same inspiratory effort and the distance between both annotated onsets is less than 250 ms. Furthermore, the table shows the number of automatically detected breaths in both sEMG channels by both algorithms. A number of zero means that signal quality criteria (e.g., based on the SNR) had not been fulfilled, thus no automated detection was conducted. Next, both sEMG channels are fused by always using the earlier onset if an inspiration is detected in both channels. The number in brackets provides the portion of breaths that were detected earlier in the diaphragm. Datasets where neither any expert has observed patient effort in  $P_{es}$  nor the automated detection was possible are left out.

## Detection validation against $P_{es}$

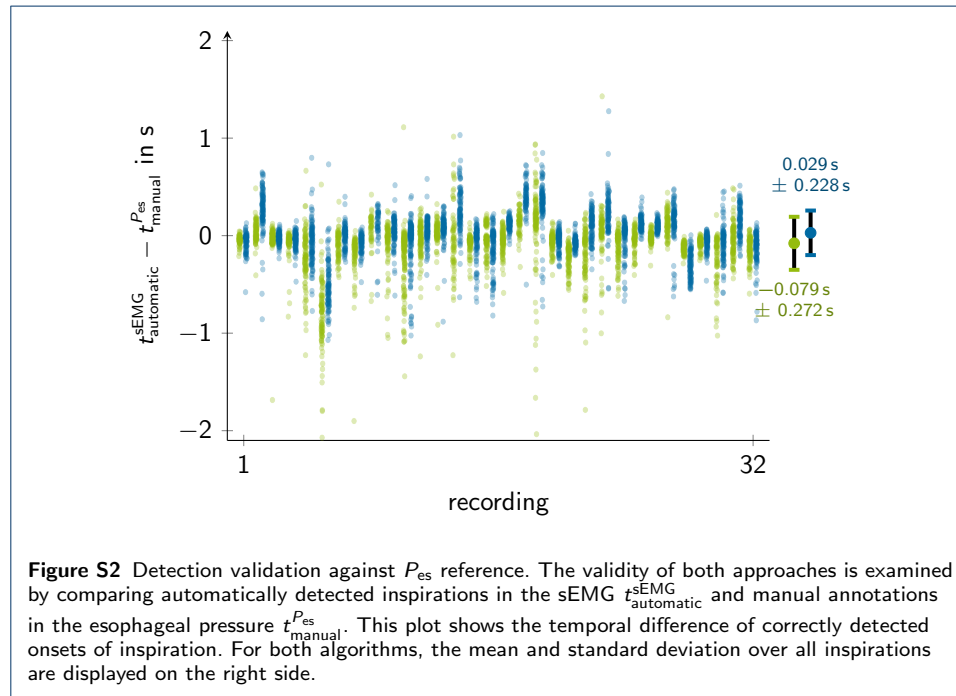

**Figure S2** Detection validation against  $P_{es}$  reference. The validity of both approaches is examined by comparing automatically detected inspirations in the sEMG  $t_{automatic}^{sEMG}$  and manual annotations in the esophageal pressure  $t_{manual}^{P_{es}}$ . This plot shows the temporal difference of correctly detected onsets of inspiration. For both algorithms, the mean and standard deviation over all inspirations are displayed on the right side.

**Table S2** Numerical results for sEMG detection performance.

| Metric                          | Triangle algorithm | Adaptive thresholding algorithm |
|---------------------------------|--------------------|---------------------------------|
| <b>Sensitivity</b>              | 0.97 (0.91-0.99)   | 1.00 (0.98-1.00)                |
| <b>PPV</b>                      | 0.94 (0.85-1.00)   | 0.87 (0.72-0.93)                |
| <b>Detection error</b>          | -0.079 ± 0.272     | 0.029 ± 0.228                   |
| <b>Absolute detection error</b> | 0.156 ± 0.240      | 0.166 ± 0.164                   |

For sensitivity and PPV (positive predictive value), the median and interquartile range across all recordings are given. The mean and standard deviation of the detection deviation  $t_{\text{automatic}} - t_{\text{manual}}$  and absolute detection deviation  $|t_{\text{automatic}} - t_{\text{manual}}|$  is calculated over all correctly detected patients efforts and is given in seconds.

**Table S3** Numerical results for PVI classification evaluation.

| Class                      | Sensitivity         |                                 | PVI classification Reference based on $t_{\text{manual}}^{P_{\text{es}}}$ |                                 | PPV                 |                                 |
|----------------------------|---------------------|---------------------------------|---------------------------------------------------------------------------|---------------------------------|---------------------|---------------------------------|
|                            | Triangle algorithm  | Adaptive thresholding algorithm | Triangle algorithm                                                        | Adaptive thresholding algorithm | Triangle algorithm  | Adaptive thresholding algorithm |
| <b>Synchronous trigger</b> | 0.86 (0.67 to 0.93) | 0.93 (0.89 to 0.99)             | 0.95 (0.78 to 1.00)                                                       | 0.87 (0.70 to 1.00)             | 0.97 (0.87 to 1.00) | 0.96 (0.83 to 1.00)             |
| <b>Delayed trigger</b>     | 1.00 (0.46 to 1.00) | 1.00 (0.15 to 1.00)             | 0.91 (0.83 to 0.98)                                                       | 0.97 (0.94 to 1.00)             | 0.08 (0.00 to 0.77) | 0.16 (0.00 to 1.00)             |
| <b>Auto trigger</b>        | 1.00 (0.64 to 1.00) | 0.81 (0.30 to 1.00)             | 0.99 (0.93 to 1.00)                                                       | 1.00 (0.99 to 1.00)             | 0.62 (0.00 to 1.00) | 1.00 (0.50 to 1.00)             |
| <b>Ineffective trigger</b> | 1.00 (0.98 to 1.00) | 1.00 (1.00 to 1.00)             | 0.99 (0.92 to 1.00)                                                       | 0.91 (0.81 to 0.96)             | 0.72 (0.12 to 1.00) | 0.11 (0.00 to 0.34)             |
| <b>Double trigger</b>      | 1.00 (1.00 to 1.00) | 1.00 (1.00 to 1.00)             | 1.00 (1.00 to 1.00)                                                       | 1.00 (1.00 to 1.00)             | 1.00 (0.95 to 1.00) | 1.00 (1.00 to 1.00)             |
| <b>Double effort</b>       | 1.00 (1.00 to 1.00) | 1.00 (1.00 to 1.00)             | 1.00 (1.00 to 1.00)                                                       | 1.00 (1.00 to 1.00)             | 1.00 (1.00 to 1.00) | 1.00 (0.85 to 1.00)             |
| <b>Total</b>               | 0.87 (0.79 to 0.98) | 0.85 (0.76 to 0.97)             | 0.94 (0.91 to 0.97)                                                       | 0.94 (0.91 to 0.96)             | 0.67 (0.54 to 0.83) | 0.67 (0.52 to 0.79)             |
| <b>Total (weighted)</b>    | 0.81 (0.66 to 0.90) | 0.87 (0.75 to 0.95)             | 0.95 (0.84 to 1.00)                                                       | 0.94 (0.78 to 1.00)             | 0.93 (0.82 to 0.98) | 0.92 (0.82 to 0.98)             |

For each PVI class, the sensitivity, specificity, and PPV (positive predictive value) are calculated per recording. This figure shows the median value and the interquartile range across recordings. Reference for the sEMG-based PVI classification is the manual annotation of inspiratory efforts in the esophageal pressure by two experts.

## Detection validation against manual sEMG reference

To assess the performance of the automated approach, the detected patient efforts in sEMG were also compared against expert annotations in sEMG. In the costal margin and parasternal sEMG channels, each expert marked the onset of inspiration based on the visible electrical activity in the signal.

The results in fig. S3 indicate that the triangle algorithm was more precise ( $p = 0.001$ ), whereas the adaptive thresholding algorithm was more sensitive ( $p = 0.002$ ). Both methods showed high median positive predictive value  $\geq 0.92$  and high median sensitivity  $\geq 0.98$ . Among the correctly detected inspirations the detection deviation  $t_{\text{automatic}}^{\text{sEMG}} - t_{\text{manual}}^{\text{sEMG}}$  was  $(-0.05 \pm 0.22)$  s for the triangle algorithm and  $(0.06 \pm 0.17)$  s for the adaptive thresholding algorithm. This means, on average, the first algorithm detected inspiratory activity earlier and the second one later than experts in the same signal.

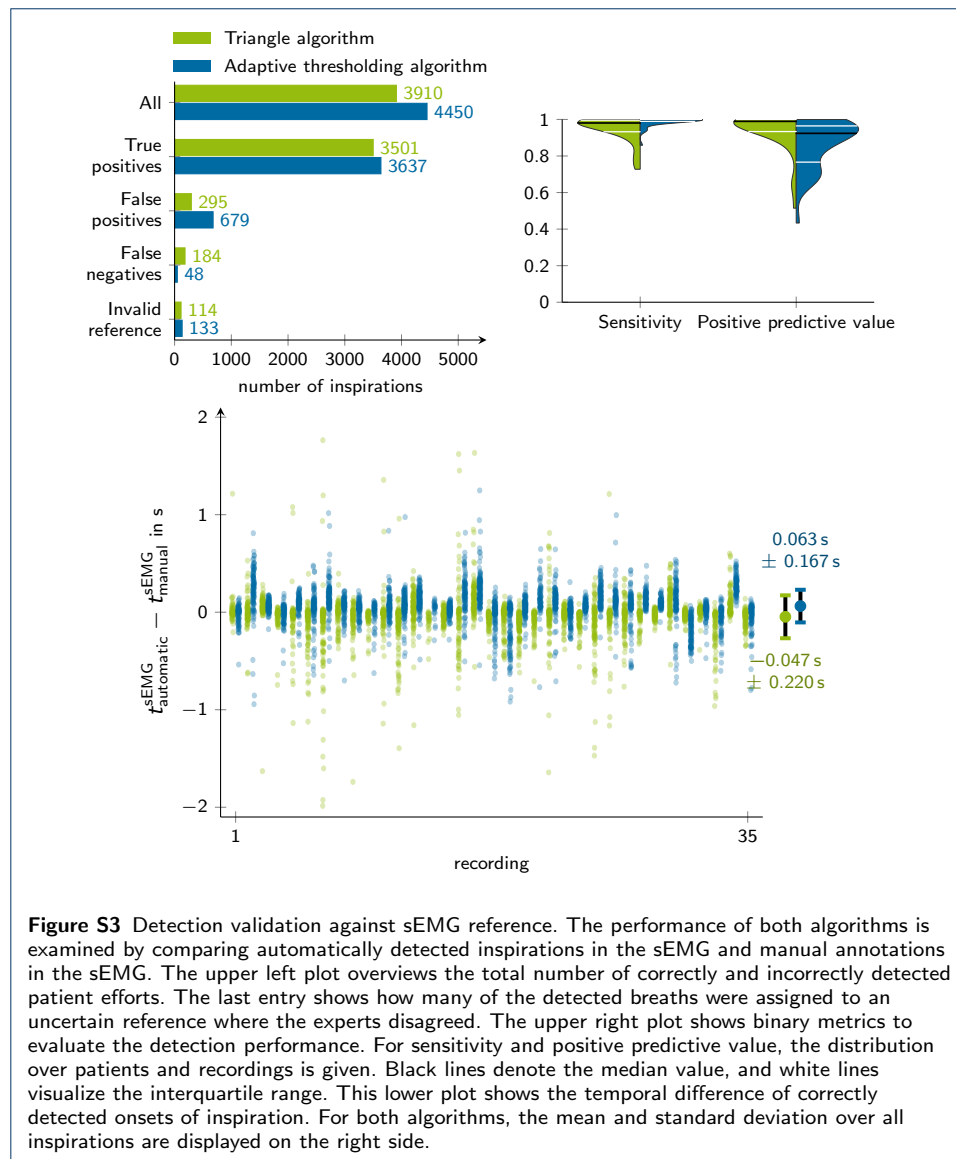

**Figure S3** Detection validation against sEMG reference. The performance of both algorithms is examined by comparing automatically detected inspirations in the sEMG and manual annotations in the sEMG. The upper left plot overviews the total number of correctly and incorrectly detected patient efforts. The last entry shows how many of the detected breaths were assigned to an uncertain reference where the experts disagreed. The upper right plot shows binary metrics to evaluate the detection performance. For sensitivity and positive predictive value, the distribution over patients and recordings is given. Black lines denote the median value, and white lines visualize the interquartile range. This lower plot shows the temporal difference of correctly detected onsets of inspiration. For both algorithms, the mean and standard deviation over all inspirations are displayed on the right side.
